# Supplementary material for: A mixed-valence biotinylated Cu(i/ii) complex for tumor-targeted chemodynamic therapy accompanied by GSH depletion
Source: Royal Society of Chemistry journal article supplement (doi:10.1039/d3qi00254c), 2023-01-01
Supplement: d3qi00254c1.pdf [file d3qi00254c1.pdf]

## ***Certificate of Animal Ethics and Protection***

The use of laboratory animals in this institution follows the principles of 3R (Reduction, Replacement, Refinement).

All experimental procedures were conducted in conformity with institutional guidelines for the animal care and use of laboratory animals, and protocols were approved by the Institutional Ethics Committee for laboratory animals.

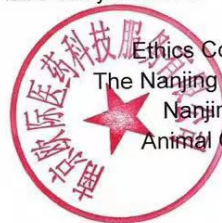

Ethics Committee for laboratory animals,  
The Nanjing Han & Zaenker Cancer Institute  
Nanjing OG Pharmaceuticals, Co., Ltd.  
Animal Certificate: SYXK(SU)2017-0040  
File number: OGKQSPF/SQ-24
