# Supplementary material for: A mixed-valence biotinylated Cu(i/ii) complex for tumor-targeted chemodynamic therapy accompanied by GSH depletion
Source: Royal Society of Chemistry journal article supplement (doi:10.1039/d3qi00254c), 2023-01-01
Supplement: d3qi00254c2.pdf [file d3qi00254c2.pdf]

Supplementary information for

**A mixed-valence biotinylated Cu(I/II) complex for tumor-targeted chemodynamic therapy accompanied with GSH depletion**

Zhaoguo Hong,<sup>a</sup> Xin You,<sup>a</sup> Jingjing Zhong,<sup>a</sup> Di Yao,<sup>a</sup> He-Dong Bian,<sup>a</sup> Shulin Zhao,<sup>a</sup> Liangliang Zhang,<sup>\*a</sup> Hong Liang,<sup>\*a</sup> and Fu-Ping Huang<sup>\*a</sup>

<sup>a</sup> State Key Laboratory for Chemistry and Molecular Engineering of Medicinal Resources, School of Chemistry & Pharmaceutical Sciences, Guangxi Normal University, Guilin 541004, P.R. China

E-mail: liangzhang319@163.com, hliang@mailbox.gxnu.edu.cn,

huangfp2010@163.com

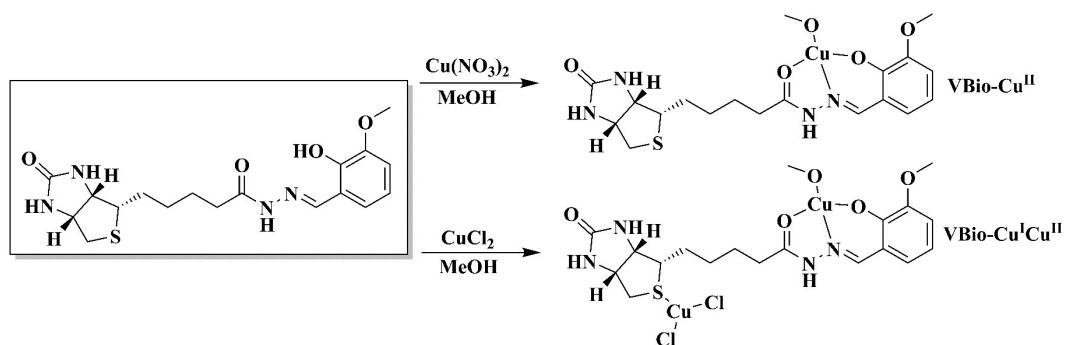

**Scheme S1.** Preparation of  $\text{VBio-Cu}^{\text{II}}$  and  $\text{VBio-Cu}^{\text{I}}\text{Cu}^{\text{II}}$ .

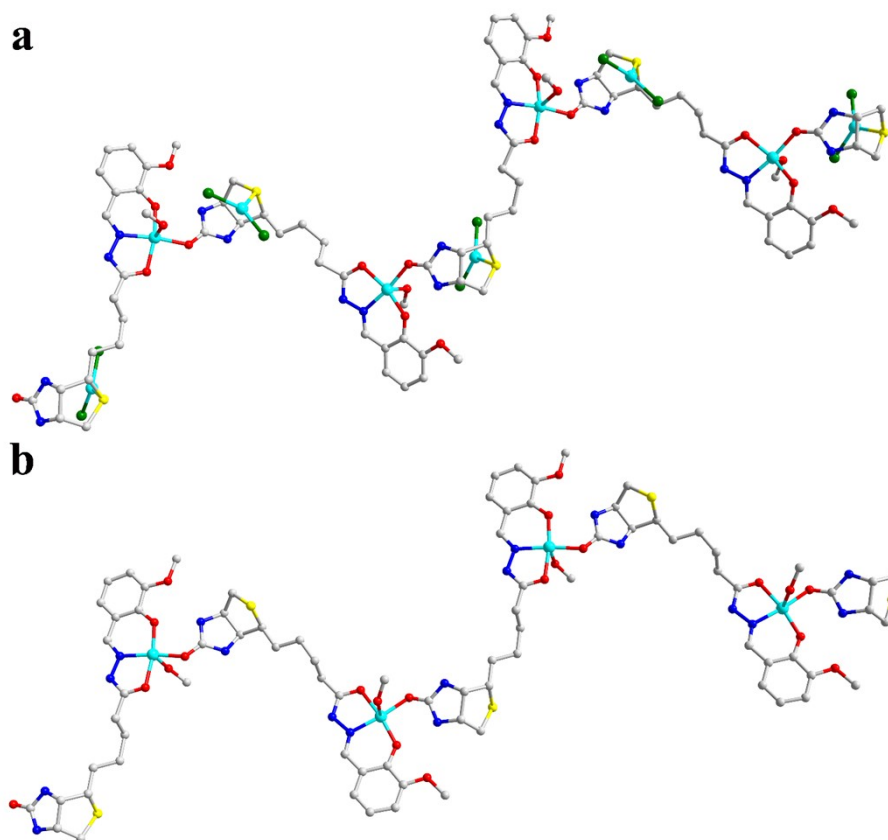

**Fig. S1.** 1D crystalline structure of  $\text{VBio-Cu}^{\text{I}}\text{Cu}^{\text{II}}$  (a) and  $\text{VBio-Cu}^{\text{II}}$  (b) (hydrogen atoms are omitted for clarity).

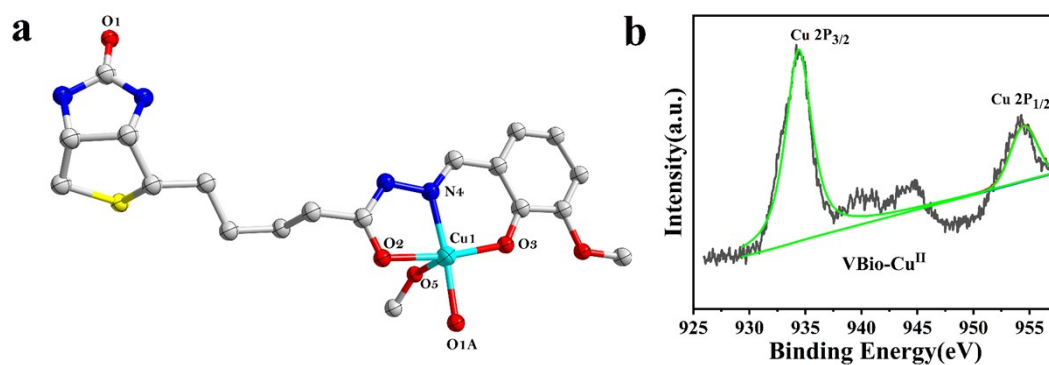

**Fig. S2.** (a) Crystal structure of **VBio-Cu<sup>II</sup>**, anions, hydrogen atoms and solvent molecules are omitted for clarity. (b) XPS spectrum of **VBio-Cu<sup>II</sup>**. The XPS data confirmed the only presence of Cu(II) in complex **VBio-Cu<sup>II</sup>**, which exhibited Cu 2p<sub>3/2</sub> and Cu 2p<sub>1/2</sub> peaks at 933.7 and 953.8 eV.<sup>1-2</sup>

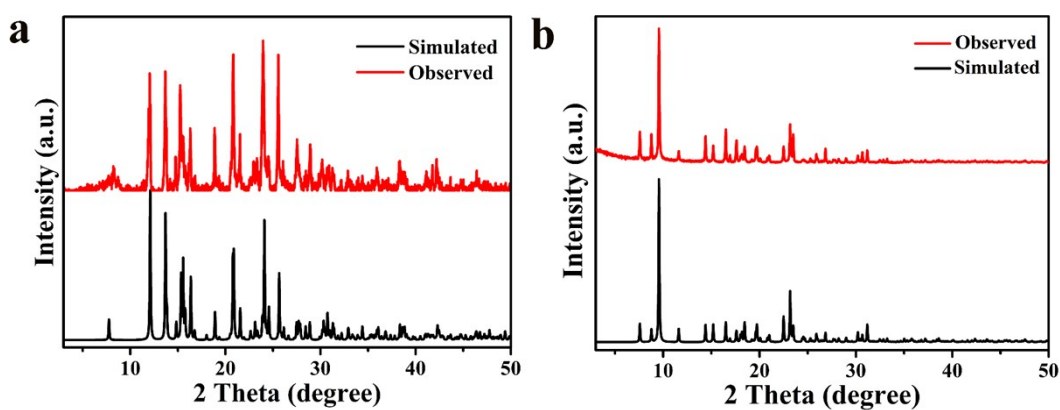

**Fig. S3.** XRD analysis of **VBio-Cu<sup>I</sup>Cu<sup>II</sup>** (a) and **VBio-Cu<sup>II</sup>** (b).

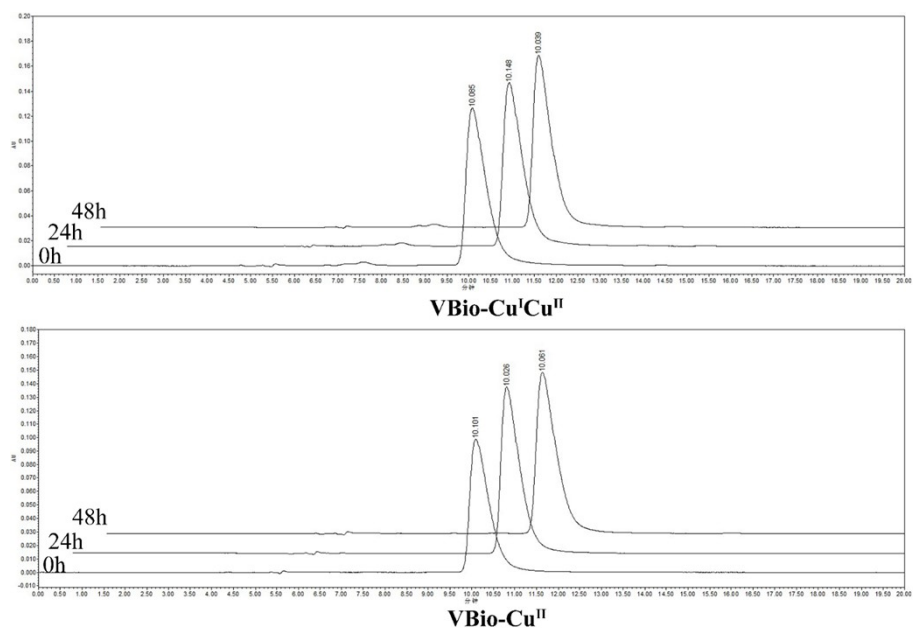

**Fig. S4.** Stability test of VBio-Cu<sup>I</sup>Cu<sup>II</sup> and VBio-Cu<sup>II</sup> after incubation in PBS (pH=7.4) for different times.

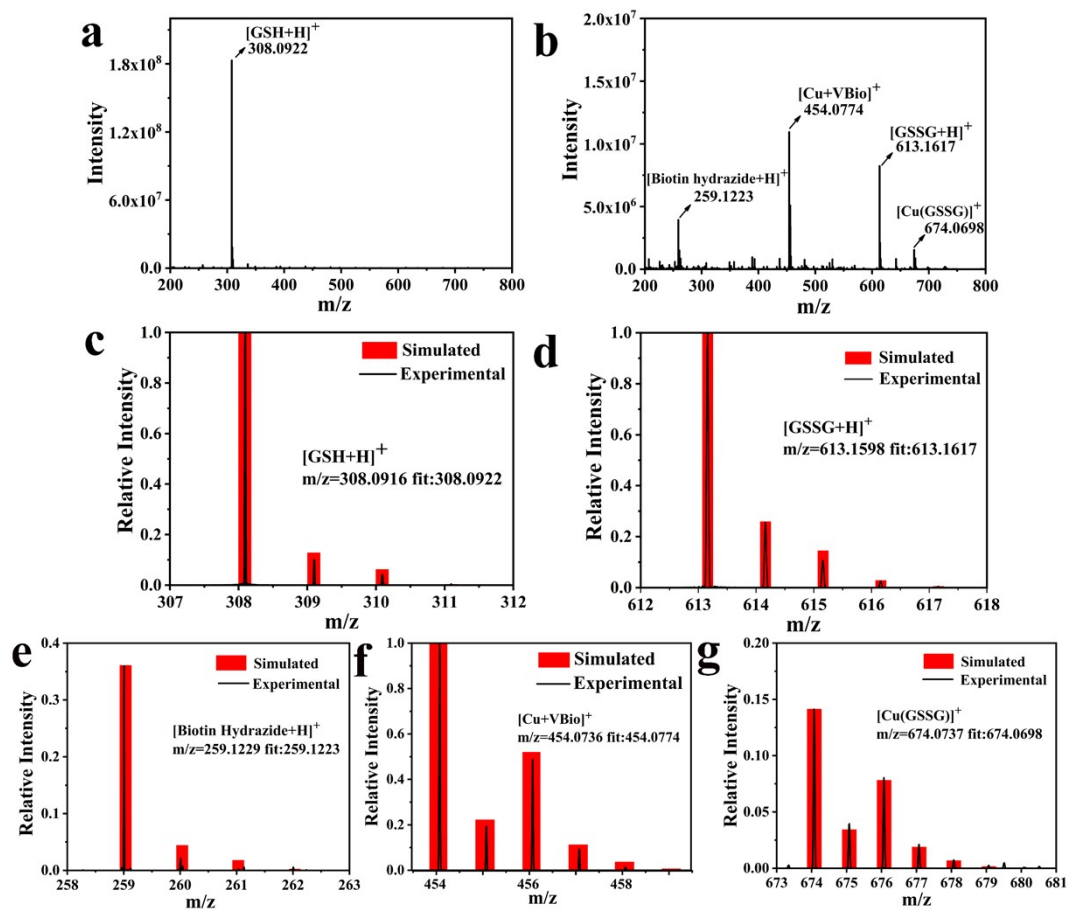

**Fig. S5.** High resolution mass spectrometry before (a) and after (b) the addition of  $\text{VBio-Cu}^{\text{I}}\text{Cu}^{\text{II}}$  into GSH solution under nitrogen atmosphere in PBS (pH=7.4, 5 % DMF). (c) Corresponding superposed simulated and experimental spectra from (a). (d-g) Corresponding superposed simulated and experimental spectra from (b).

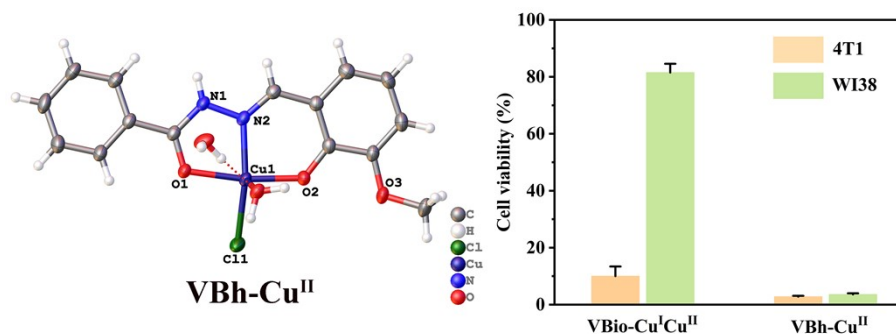

**Fig. S6.** Crystal structure of VBh-Cu<sup>II</sup> (left). Cell viability of 4T1/WI38 cells after treatment with 25  $\mu$ M VBio-Cu<sup>I</sup>Cu<sup>II</sup> (presence of 100  $\mu$ M H<sub>2</sub>O<sub>2</sub>) or VBh-Cu<sup>II</sup> for 48 h (right).

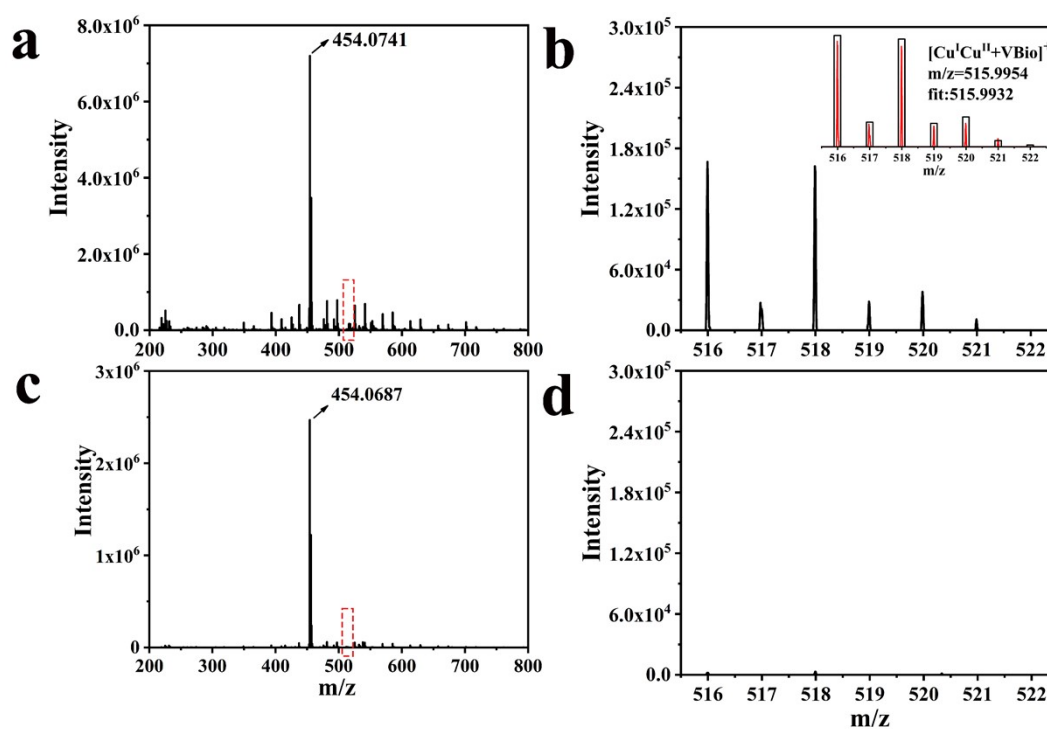

**Fig. S7.** (a-b) High resolution mass spectrometry and corresponding amplification area of VBio-Cu<sup>I</sup>Cu<sup>II</sup>, insert in (b): corresponding superposed simulated and experimental spectra. (c-d) High resolution mass spectrometry and corresponding amplification area of VBio-Cu<sup>II</sup>.

**Table S1.** Crystal data and structure refinement for two complexes.

| Complex                                                                         | VBio-Cu <sup>I</sup> Cu <sup>II</sup>                                                           | VBio-Cu <sup>II</sup>                                             |
|---------------------------------------------------------------------------------|-------------------------------------------------------------------------------------------------|-------------------------------------------------------------------|
| Empirical formula                                                               | C <sub>19</sub> H <sub>27</sub> Cl <sub>2</sub> Cu <sub>2</sub> N <sub>4</sub> O <sub>5</sub> S | C <sub>19</sub> H <sub>28</sub> CuN <sub>5</sub> O <sub>9</sub> S |
| Formula weight                                                                  | 621.48                                                                                          | 566.06                                                            |
| Crystal system                                                                  | Monoclinic                                                                                      | Monoclinic                                                        |
| Space group                                                                     | <i>P2<sub>1</sub></i>                                                                           | <i>P2<sub>1</sub></i>                                             |
| <i>a</i> (Å)                                                                    | 6.8033 (6)                                                                                      | 5.3882 (9)                                                        |
| <i>b</i> (Å)                                                                    | 22.7687 (12)                                                                                    | 23.305 (2)                                                        |
| <i>c</i> (Å)                                                                    | 8.1373 (7)                                                                                      | 10.0694 (13)                                                      |
| $\alpha$ (°)                                                                    | 90.00                                                                                           | 90.00                                                             |
| $\beta$ (°)                                                                     | 108.401 (9)                                                                                     | 94.765 (15)                                                       |
| $\gamma$ (°)                                                                    | 90.00                                                                                           | 90.00                                                             |
| Volume (Å <sup>3</sup> )                                                        | 1196.04 (17)                                                                                    | 1263.4 (3)                                                        |
| <i>Z</i>                                                                        | 2                                                                                               | 2                                                                 |
| <i>D</i> <sub>calc</sub> (g cm <sup>-3</sup> )                                  | 1.726                                                                                           | 1.729                                                             |
| <i>F</i> (000)                                                                  | 634                                                                                             | 588                                                               |
| Reflections collected                                                           | 7641                                                                                            | 7309                                                              |
| Independent reflections                                                         | 4494                                                                                            | 4435                                                              |
| <i>R</i> <sub>int</sub>                                                         | 0.046                                                                                           | 0.064                                                             |
| Goodness-of-fit<br>on <i>F</i> <sup>2</sup>                                     | 1.05                                                                                            | 1.03                                                              |
| <i>R</i> <sub>1</sub> , <i>wR</i> <sub>2</sub><br>[ <i>I</i> ≥ 2σ ( <i>I</i> )] | 0.0568, 0.0938                                                                                  | 0.066, 0.01233                                                    |
| <i>R</i> <sub>1</sub> , <i>wR</i> <sub>2</sub> [all data]                       | 0.0933, 0.1121                                                                                  | 0.01275, 0.01651                                                  |

**Table S2.** Selected bond lengths (Å) and angles (°) for two copper complexes.

| VBio-Cu <sup>I</sup> Cu <sup>II</sup> |             |             |             |
|---------------------------------------|-------------|-------------|-------------|
| Cu1—O3                                | 1.891 (7)   | Cu1—O5      | 2.314 (9)   |
| Cu1—N4                                | 1.928 (8)   | Cu2—Cl1     | 2.221 (4)   |
| Cu1—O1A                               | 1.947 (7)   | Cu2—S1      | 2.235 (3)   |
| Cu1—O2                                | 2.005 (7)   | Cu2—Cl2     | 2.260 (3)   |
| O3—Cu1—N4                             | 89.7 (3)    | O3—Cu1—O5   | 95.2 (3)    |
| O3—Cu1—O1A                            | 96.7 (3)    | N4—Cu1—O5   | 92.8 (4)    |
| N4—Cu1—O1A                            | 172.4 (4)   | O1A—Cu1—O5  | 90.6 (3)    |
| O3—Cu1—O2                             | 165.0 (3)   | O2—Cu1—O5   | 96.5 (3)    |
| N4—Cu1—O2                             | 80.4 (3)    | Cl1—Cu2—S1  | 119.94 (13) |
| O1A—Cu1—O2                            | 92.5 (3)    | Cl1—Cu2—Cl2 | 115.50 (14) |
| S1—Cu2—Cl2                            | 122.95 (13) |             |             |
| VBio-Cu <sup>II</sup>                 |             |             |             |
| Cu1—O3                                | 1.882 (6)   | Cu1—O2      | 1.995 (6)   |
| Cu1—N4                                | 1.943 (8)   | Cu1—O1A     | 1.927 (6)   |
| Cu1—O5                                | 2.365 (8)   |             |             |
| O3—Cu1—N4                             | 90.9 (3)    | O3—Cu1—O5   | 97.9 (3)    |
| O3—Cu1—O2                             | 168.9 (3)   | O3—Cu1—O1A  | 95.9 (2)    |
| N4—Cu1—O5                             | 94.7 (3)    | N4—Cu1—O2   | 81.1 (3)    |
| O2—Cu1—O5                             | 90.4 (3)    | O1A—Cu1—N4  | 172.2 (3)   |
| O1A—Cu1—O5                            | 88.2 (3)    | O1A—Cu1—O2  | 91.7 (3)    |

## Reference

1. J. Wang, J. Ren, Q. Tang, X. Wang, Y. Wang, Y. Wang, Z. Du, W. Wang, L. Huang, L.A. Belfiore and J. Tang, An Efficient Cyan Emission from Copper (II) Complexes with Mixed Organic Conjugate Ligands, *Materials*, 2022, **15**, 1719.
2. B. Ma, S. Wang, F. Liu, S. Zhang, J. Duan, Z. Li, Y. Kong, Y. Sang, H. Liu, W. Bu and L. Li, Self-Assembled Copper-Amino Acid Nanoparticles for in Situ Glutathione "AND" H<sub>2</sub>O<sub>2</sub> Sequentially Triggered Chemodynamic Therapy, *J. Am. Chem. Soc.*,



2019, **141**, 849–857.
